# Supplementary material for: Optical excitation of MgO nanoparticles; a computational perspective
Source: Royal Society of Chemistry journal article supplement (doi:10.1039/c4cp03442b), 2014-01-01
Supplement: c4cp03442b1.pdf [file c4cp03442b1.pdf]

**Electronic supplementary information for**

**Optical excitation of MgO nanoparticles; A computational  
perspective**

Milena C. C. Wobbe<sup>1</sup>, Andrew Kerridge<sup>1,2</sup>, and Martijn A. Zwijnenburg<sup>1,\*</sup>

<sup>1</sup> Department of Chemistry, University College London, 20 Gordon Street,  
London WC1H 0AJ, U.K. Email: m.zwijnenburg@ucl.ac.uk

<sup>2</sup> Department of Chemistry, Lancaster University, Lancaster LA1 4YB,  
U.K.

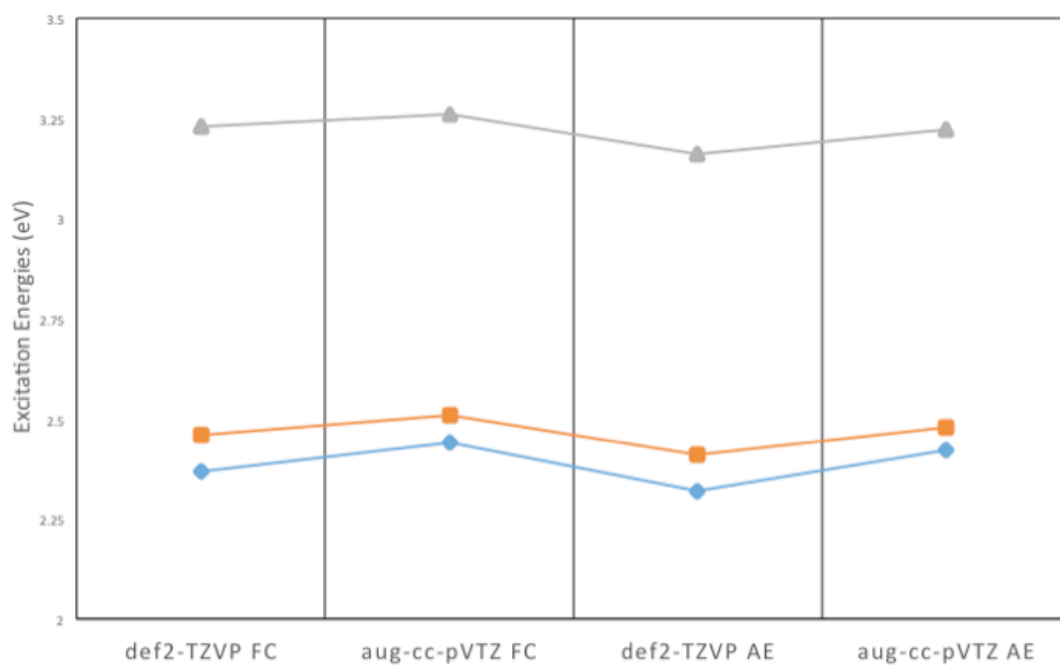

**Fig. S1** Effect of the frozen core approximation on the lowest EOM-CCSD excitation energies of (MgO)<sub>2</sub>. Blue diamonds 1-<sup>1</sup>b<sub>1g</sub> state, orange squares 1-<sup>1</sup>b<sub>3u</sub> state, and grey triangles 1-<sup>1</sup>b<sub>1g</sub> state.

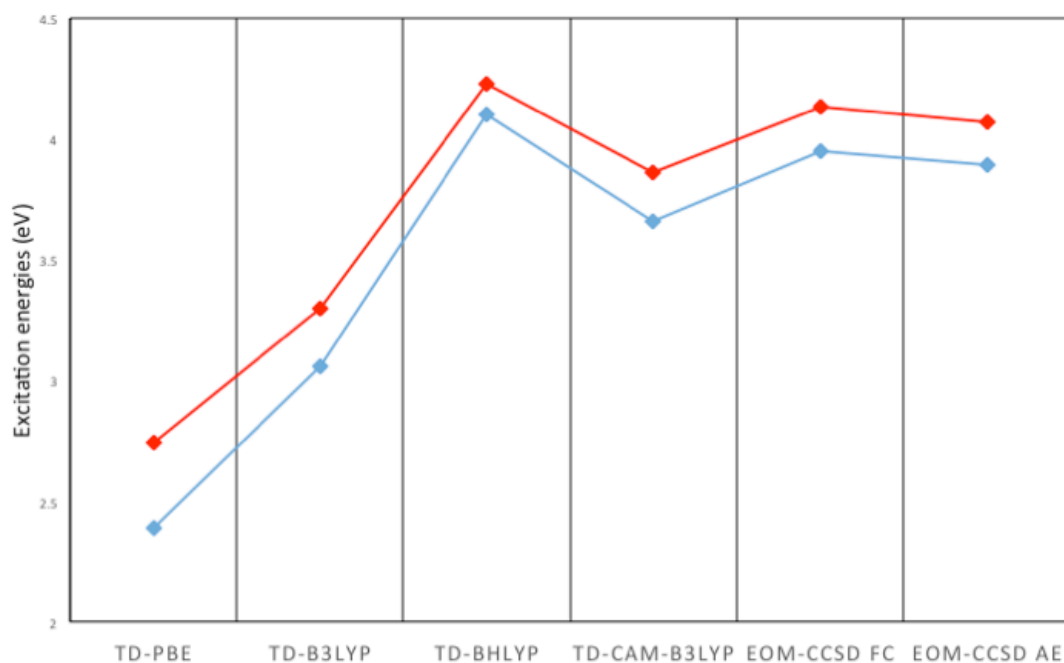

**Fig. S2** Excitation energies of the two lowest excitations of the  $(\text{MgO})_4$  cluster as calculated using TD-DFT and EOM-CC. Blue diamonds 1-<sup>1</sup>t state, red diamonds 2-<sup>1</sup>t state. Calculations were performed in the  $D_2$  sub of the full  $T_d$  point group because the EOM-CCSD implementation cannot handle non-Abelian point groups, and hence we cannot distinguish  $t_1$  from  $t_2$  states.

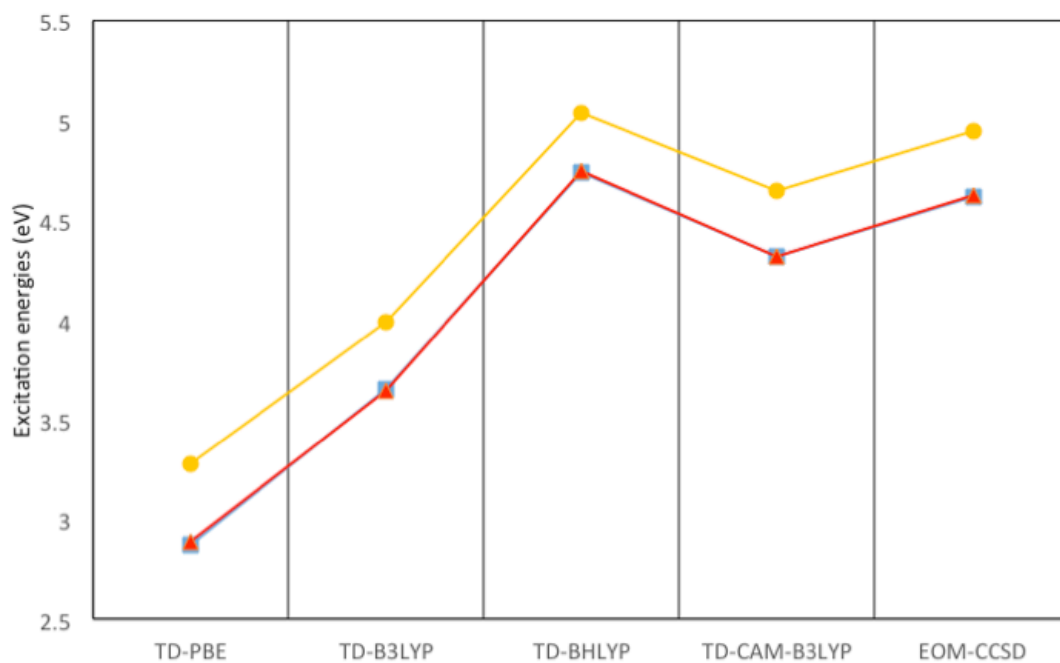

**Fig. S3** Excitation energies of the three lowest excitations of the hexagonal (MgO)<sub>6</sub> cluster as calculated using TD-DFT and EOM-CC. Blue squares 1-<sup>1</sup>a state, red diamonds 1-<sup>1</sup>e state, and yellow circles 2-<sup>1</sup>e state. Calculations were performed in the C<sub>s</sub> sub of the full D<sub>3d</sub> point group because the EOM-CCSD implementation cannot handle non-Abelian point groups, and hence we cannot distinguish e<sub>g</sub> from e<sub>u</sub> states, nor a from b states.

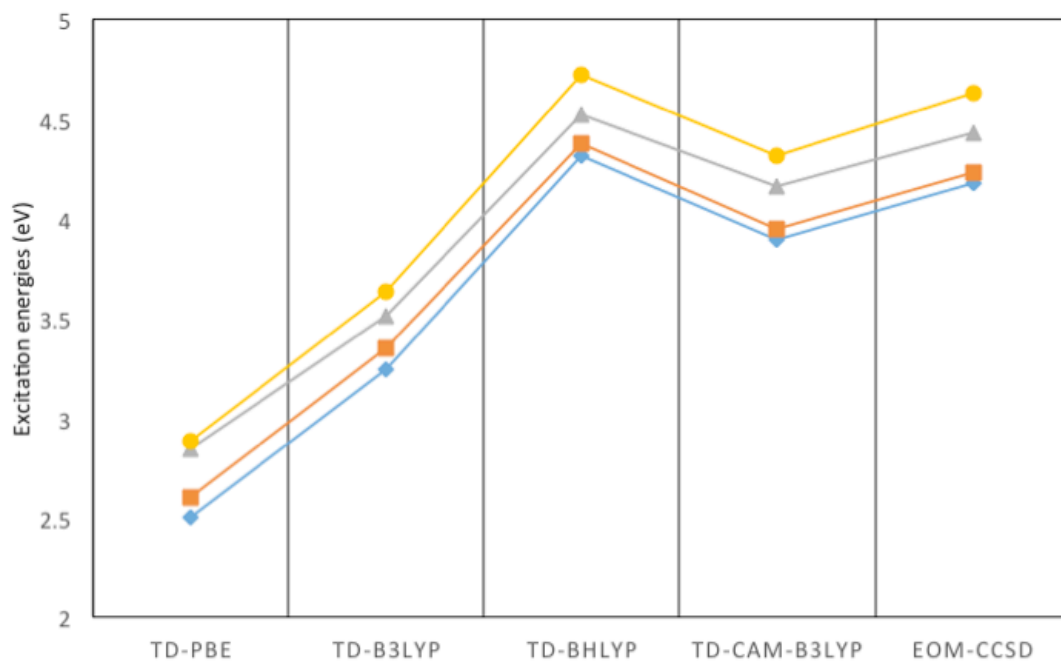

**Fig. S4** Excitation energies of the four lowest excitations of the cubic (MgO)<sub>6</sub> cluster as calculated using TD-DFT and EOM-CC. Blue diamonds 1-<sup>1</sup>b<sub>2u</sub> state, red squares 1-<sup>1</sup>b<sub>3g</sub> state, grey triangles 1-<sup>1</sup>b<sub>1g</sub> state, and yellow circles 1-<sup>1</sup>a<sub>g</sub> state.

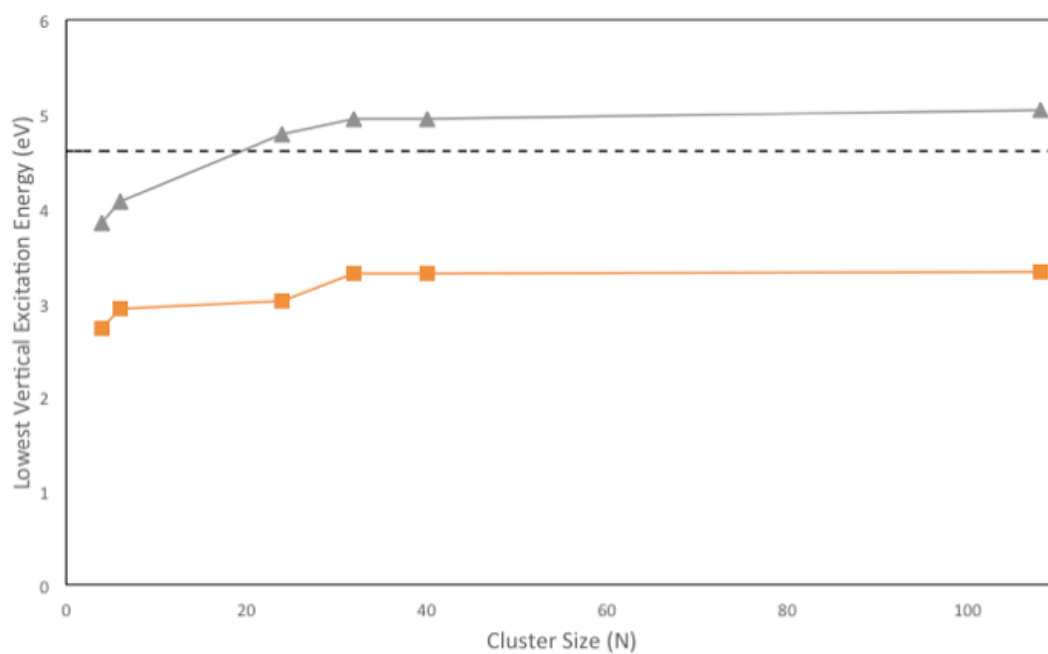

**Fig. S5** Lowest vertical excitation energy (LVEE) of  $(\text{MgO})_4$  to  $(\text{MgO})_{108}$  nanocubes calculated using TD-B3LYP and TD-BHLYP and the DZ(D)P basis-set. Orange squares represent TD-B3LYP results, grey triangles TD-BHLYP results and the dashes lines the experimental absorption on-set of 3 nm particles.

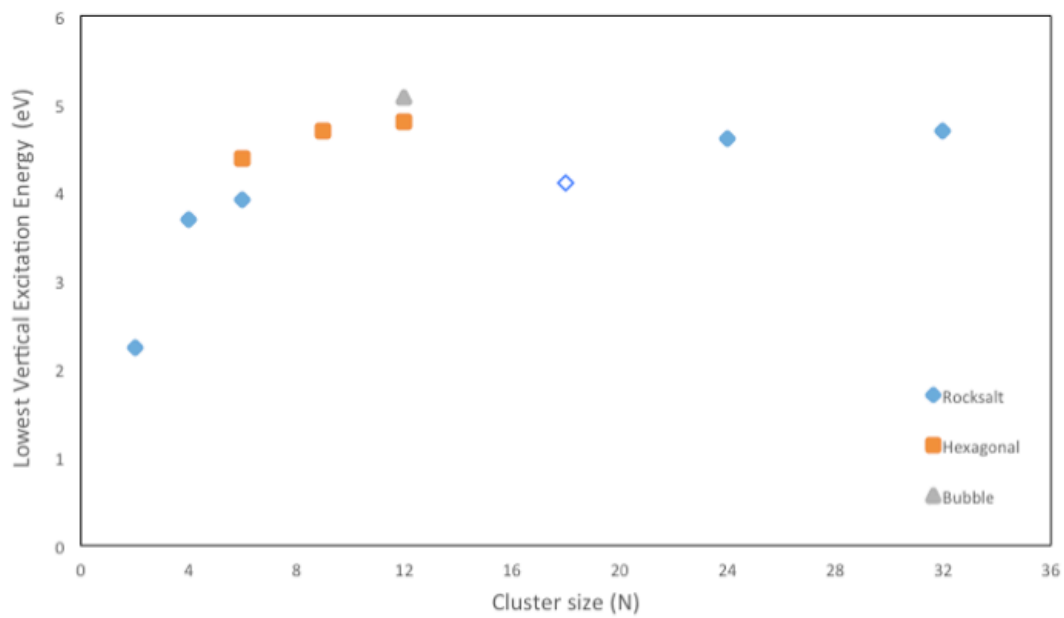

**Fig. S6** Lowest vertical excitation energy (LVEE) of  $(\text{MgO})_1$  to  $(\text{MgO})_{32}$  calculated using TD-CAM-B3LYP. Open symbols correspond to particles with faces containing odd number of atoms.

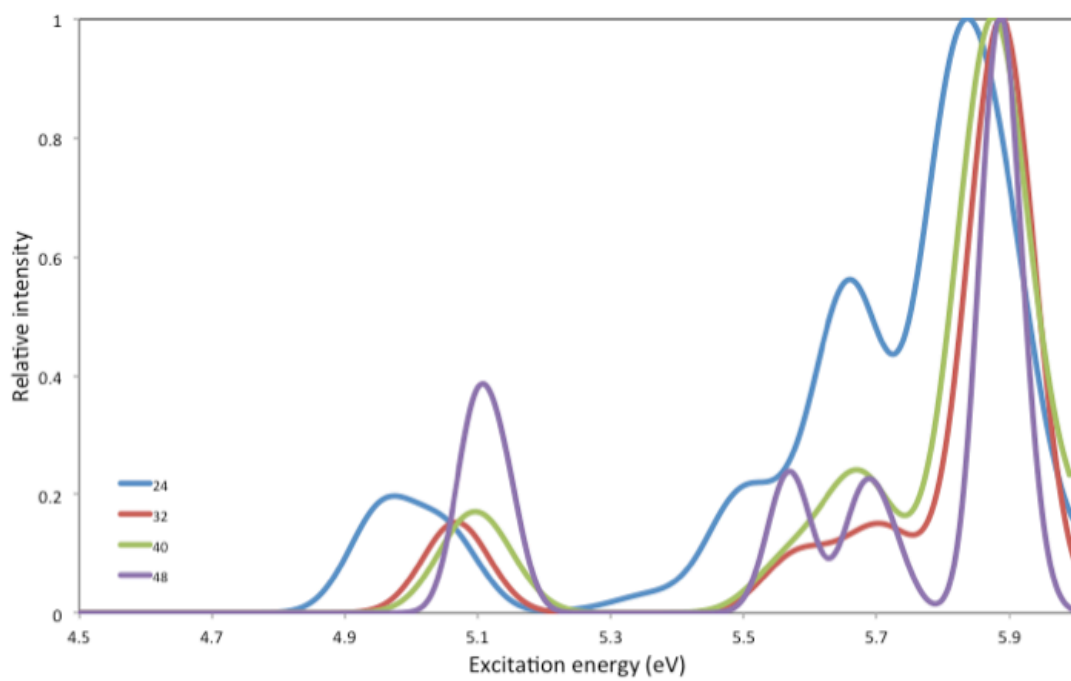

**Fig. S7** unshifted TD-BHLYP calculated absorption spectra (without the 0.5 eV rigid blue-shift discussed in the text) of (MgO)<sub>24</sub>, (MgO)<sub>32</sub>, (MgO)<sub>40</sub> and (MgO)<sub>48</sub>.



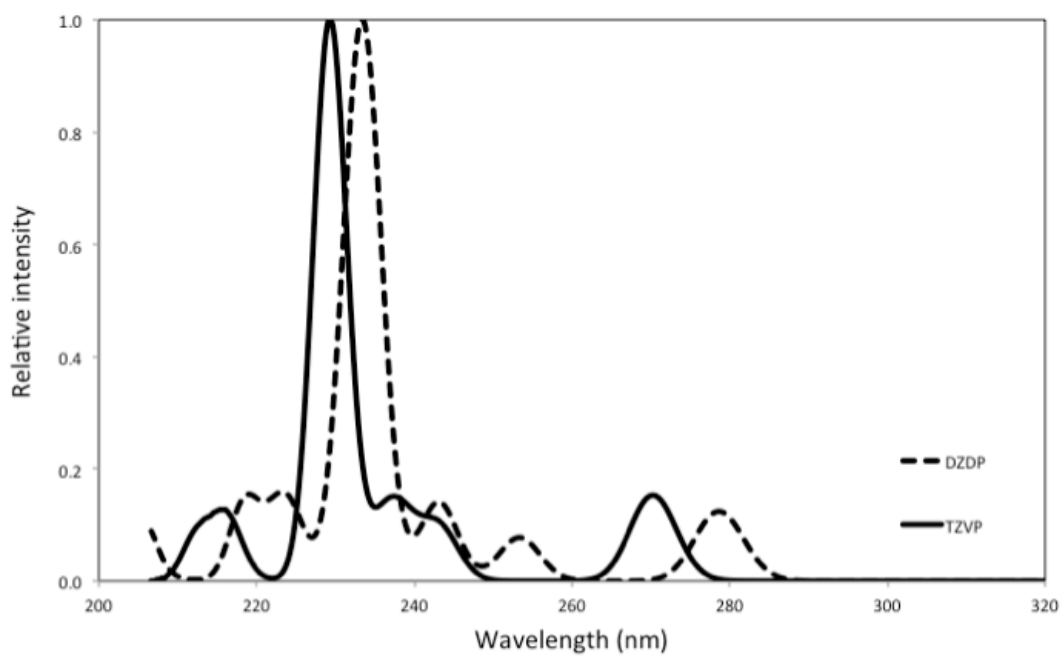

**Fig. S8** Comparison of the absorption spectra of the def2-TZVP and DZ(D)P TD-BHLYP spectra of  $(\text{MgO})_{32}$  (including the 0.5 eV rigid red-shift discussed in the text).

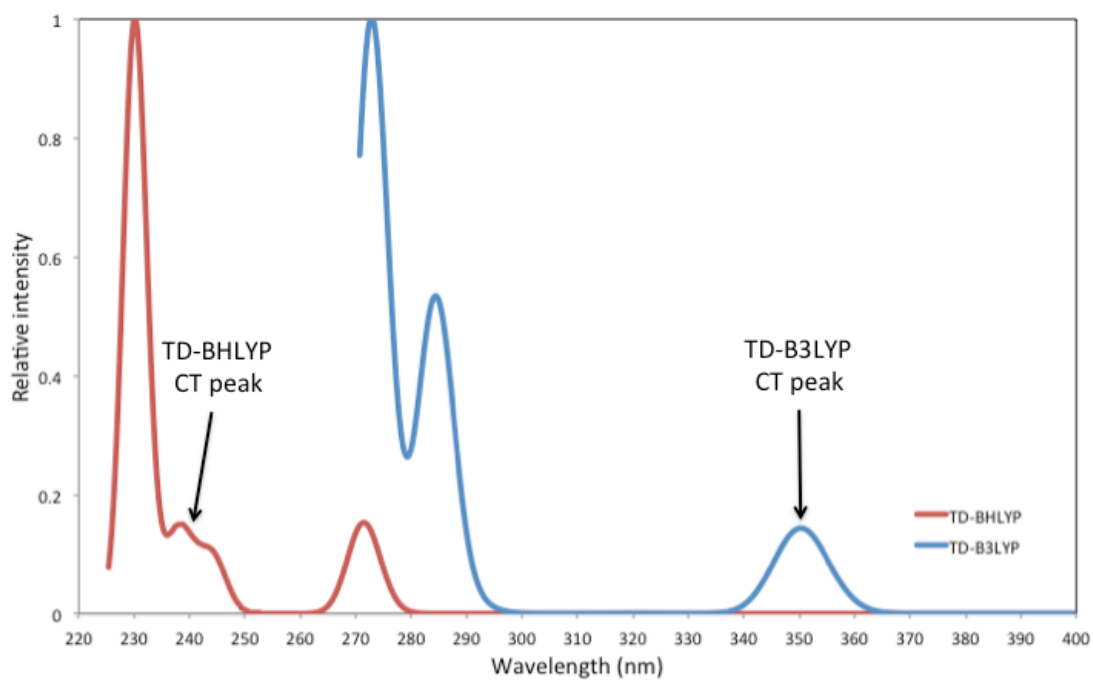

**Fig. S9** Comparison of the absorption spectrum of  $(\text{MgO})_{32}$  as calculated with TD-B3LYP and TD-BHLYP.

**Table S1** Length of the edges and body diagonal of the DFT optimised cuboid MgO nanoparticles.

| Particle             | Edges (nm)       | Body diagonal (nm) |
|----------------------|------------------|--------------------|
| (MgO) <sub>24</sub>  | 0.59 (2x) / 0.4  | 0.94               |
| (MgO) <sub>32</sub>  | 0.59 (3x)        | 1.02               |
| (MgO) <sub>40</sub>  | 0.79 / 0.59 (2x) | 1.16               |
| (MgO) <sub>48</sub>  | 1.01 / 0.59 (2x) | 1.32               |
| (MgO) <sub>108</sub> | 0.99 (3x)        | 1.72               |
